# Supplementary material
Source: publisher site journal article supplement (https://www.kjim.org/upload/media/kjim-2023-115-Supplementary-Table-1.pdf)
Supplement: Supplementary file 1 [file kjim-2023-115-Supplementary-Table-1.pdf]

**Supplementary Table. Risk of bias within included non-randomized trials using the Risk of Bias In Non-randomized Studies of Interventions (ROBINS-I) tool**

| Reference                   | Confounding   | Selection bias | Classification of interventions | Deviation from interventions | Missing data   | Measurement of outcome | Selection of reported result |
|-----------------------------|---------------|----------------|---------------------------------|------------------------------|----------------|------------------------|------------------------------|
| Cowley et al., 2019 [15]    | Moderate risk | Low risk       | Low risk                        | Low risk                     | No information | Low risk               | Low risk                     |
| Deshpande et al., 2021 [16] | Low risk      | Low risk       | Low risk                        | Low risk                     | Low risk       | Low risk               | Low risk                     |
| Joung et al., 2011 [17]     | Moderate risk | Moderate risk  | Low risk                        | Low risk                     | No information | Low risk               | Low risk                     |
| Kwon et al., 2019 [18]      | Low risk      | Low risk       | Low risk                        | Low risk                     | Low risk       | Low risk               | Low risk                     |
| Raman et al., 2013 [19]     | Low risk      | Low risk       | Moderate risk                   | Moderate risk                | No information | Low risk               | Low risk                     |
| Schlueter et al., 2010 [20] | Low risk      | Low risk       | Low risk                        | Low risk                     | Low risk       | Low risk               | Low risk                     |
